# Supplementary material for: Hydrogen-ion driven molecular motions in Cu2+-complexes of a ditopic phenanthrolinophane ligand
Source: Royal Society of Chemistry journal article supplement (doi:10.1039/b309721h), 2003-01-01
Supplement: b309721h.doc [file b309721h.doc]

**Supplementary Materials**

# Experimental

# Synthesis of the receptor

**2,6,9,12,16-pentaaza[17](2,9)(1,10)-phenanthrolinophane Pentahydrobromide(L•5HBr).**

4,7,10-Tris(*p*-tolylsulfonyl)-4,7,10 triaazatridecane-1,13-diamine (2.5g, 3.68 mmol) and 1,10-phenanthroline-2,9-dicarboxaldehyde (0.88g, 3.73 mmol) were stirred overnight in a mixture (1:5) CHCl3 : MeOH (300 ml) to give the imine. Sodium borohydride (0.57g, 15.2 mmol) was added and the mixture was stirred at room temperature for 24 hours.The solution was removed at reduced pressure.The resulting residue was treated with water (50 ml) and extracted with dichloromethane (2 45 ml).Then, it was dried over Na2SO4 and the solvent removed by rotary evaporation .The tosyl groups of the **L-3Ts** (3g, 3.39 mmol) were removed by reductive cleavage with a mixture of HBr-acetic acid 33% (120 cm3) and phenol (15g, 160 mmol) heating at 90 °C for 18 h and then cooled.The resulting solid was filtered off and washed several times with CH2Cl2 and EtOH. The macrocycle was obtained as its hydrobromide salt,1.2 g. **Yield** 44 %. **NMR; H** (D2O) 1.95–2.03 (m, 4H), 2.99 (t, 4H, J=8), 3.12 (t, 4H, J=8 Hz), 3.31–3.39 (m, 8H), 4.6 (s, 4H), 7.63 (d, 2H, J=8 Hz), 7.75(s, 2H), 8.34 (d, 2H). **C** (D2O) 22.9, 43.3, 43.7, 45.1, 45.5, 51.9, 123.7, 127.5, 129.4, 139.9, 150.9. Anal. Calc for **C24H40N7·5HBr:** C, 34.89; H, 4.88; N, 11.88. Found: C, 35.0; H, 4.9 N, 12.0 %

Fig. S1.- Distribution diagram for the system Cu2+:L determined for 2:1 molar ratio ([Cu2+] = 2x10-3 M)

Visible spectrum of the system Cu2+-L as a function of pH (L= .002 M, Cu(II)= .001M)
